# Supplementary material
Source: publisher figshare collection journal article supplement (https://acs.figshare.com/ndownloader/files/5829159)
Supplement: Supplementary file 1 [file 5829159]

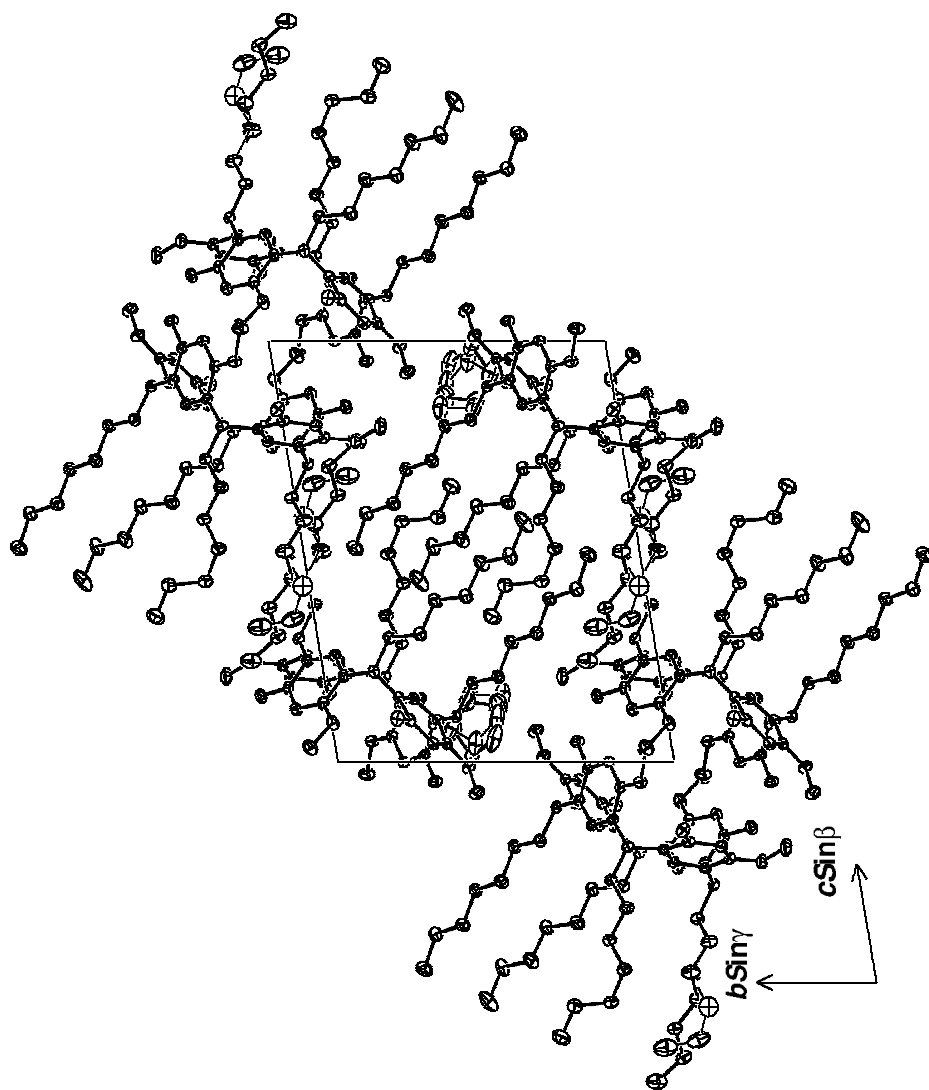

nm

The unit cell contents projected down  $a$ , showing the inversion related facing cones and the *quasi*-parallel packing of the alkyl 'tails' 2, 3 and 4 and their inversion images.
